# Supplementary material for: Simultaneous adsorptive removal of fluoride and phosphate by magnesia–pullulan composite from aqueous solution
Source: Royal Society of Chemistry journal article supplement (doi:10.1039/c6ra07175a), 2016-01-01
Supplement: c6ra07175a1.pdf [file c6ra07175a1.pdf]

**Simultaneous adsorptive removal of fluoride and phosphate by magnesia-pullulan composite from aqueous solution**

Yuanyao Ye<sup>1</sup>; Ying Hu; Zakir Hussain; Xi Li; Daosheng Li; Jianxiong Kang<sup>1,\*</sup>

<sup>1</sup>*School of Environmental Science and Engineering, Huazhong University of Science and Technology, No. 1037 Luoyu Road, Wuhan 430074, PR China*

\*Corresponding author. [Tel:+86 2787792512](tel:+862787792512). Fax: +86 2787792172

E-mail address: [jxkang@hust.edu.cn](mailto:jxkang@hust.edu.cn)

**Supplementary Figure captions**

**Supplementary Fig. S1** XRD patterns of (a) MgOP (b) MgOP after the simultaneous adsorption of fluoride and phosphate

**Supplementary Fig. S2** Effect of adsorbent dose on simultaneous adsorption of fluoride and phosphate ( $C_{0(F)}=C_{0(P)}=10$  mg/L, pH 7.0, reaction temperature 298 K)

**Supplementary Fig. S3** Effect of initial pH on simultaneous adsorption of fluoride and phosphate ( $C_{0(F)}=C_{0(P)}=10$  mg/L, reaction temperature 298 K)

**Supplementary Fig. S4** Effect of the main forms of phosphate existing in the domestic wastewater on simultaneous adsorption of fluoride and phosphate ( $C_{0(F)}=10$  mg/L, pH 7.0, reaction temperature 298 K)

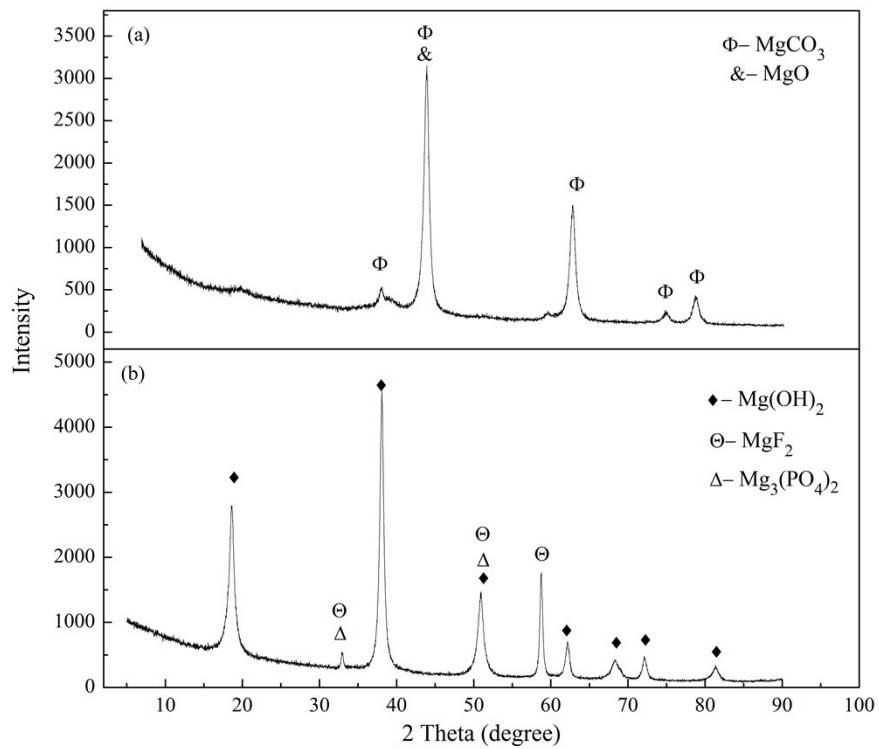

Supplementary Fig. S1

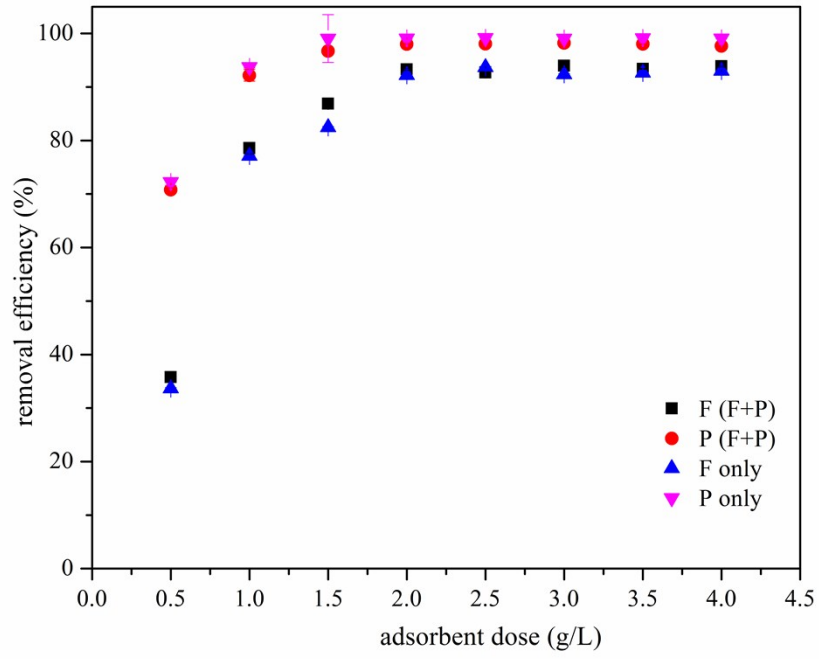

**Supplementary Fig. S2**

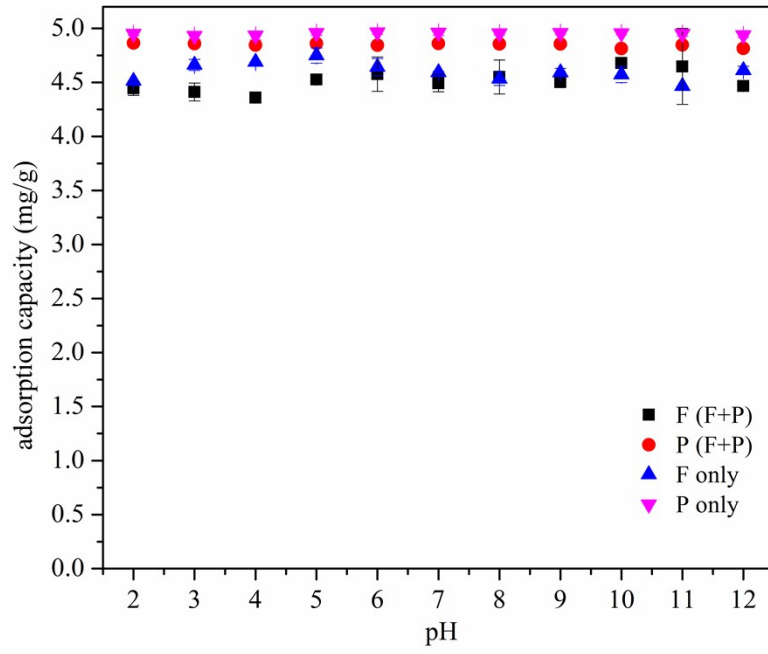

Supplementary Fig. S3

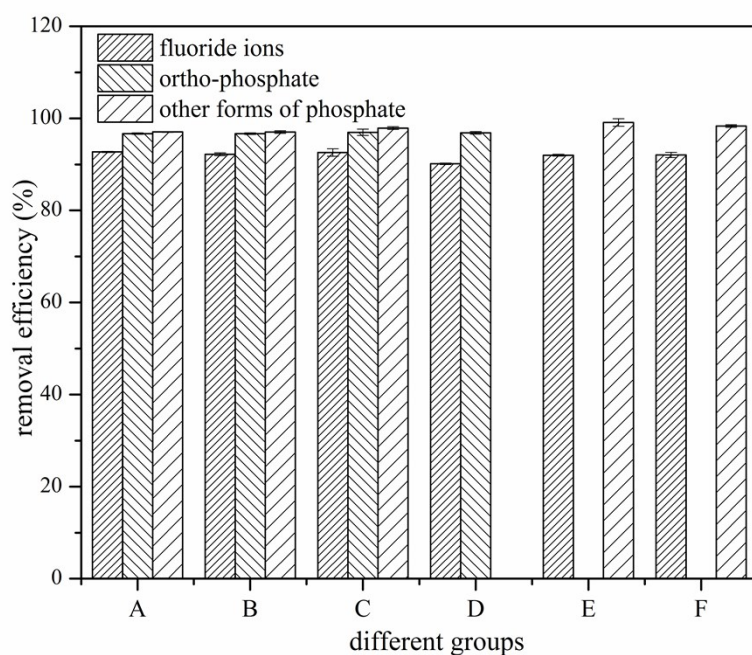

A, B, C, D, E and F reflect the different groups which coexist with fluoride ions in aqueous solution, i.e., A: orthophosphate, pyrophosphate and polyphosphates; B: orthophosphate and polyphosphates; C: orthophosphate and pyrophosphate; D: orthophosphate; E: polyphosphates; F: pyrophosphate.

### Supplementary Fig. S4
